# Supplementary figures and images for: Metformin-mediated growth inhibition involves suppression of the IGF-I receptor signalling pathway in human pancreatic cancer cells
Source: Springer Nature journal article supplement (doi:10.1186/1471-2407-13-235), 2013-05-10

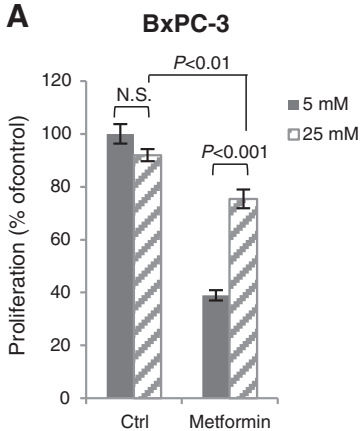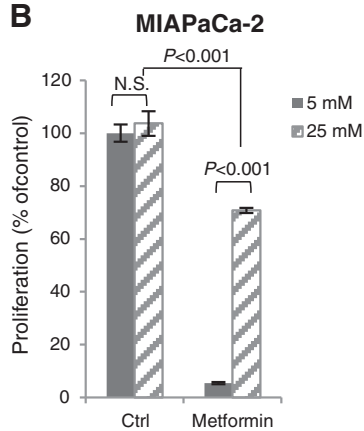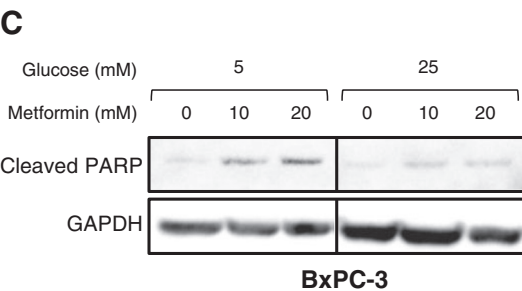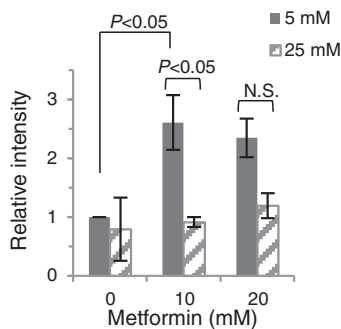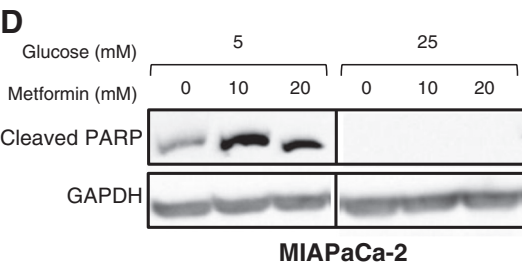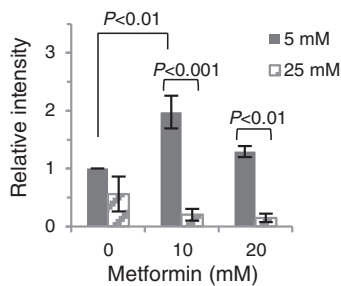

Supplement: 12885_2012_3873_MOESM2_ESM.pdf [file 12885_2012_3873_MOESM2_ESM.pdf]

**A**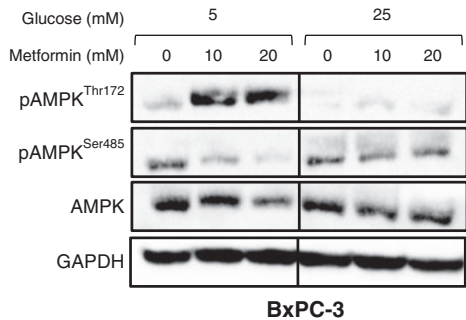**B**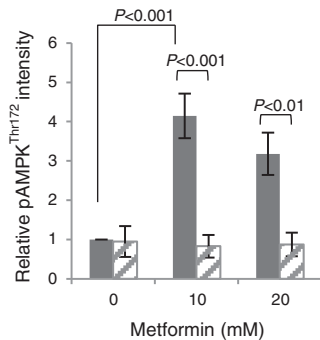**C**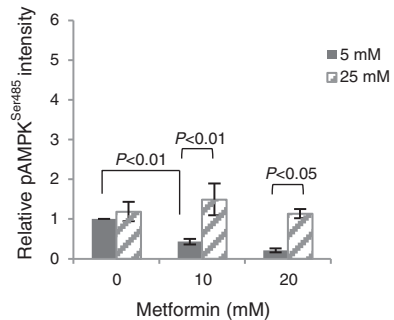**D**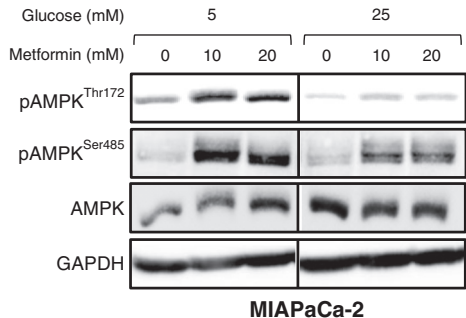**E**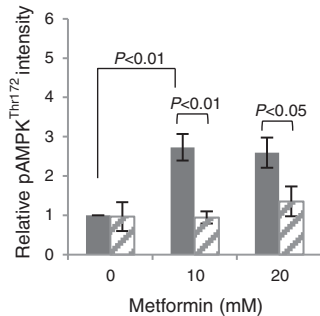**F**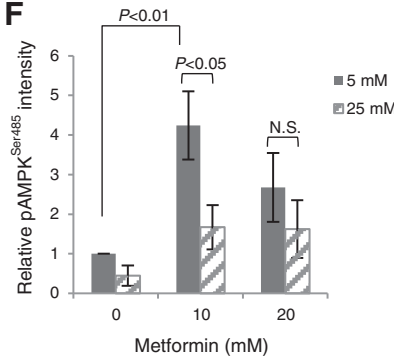

Supplement: 12885_2012_3873_MOESM3_ESM.pdf [file 12885_2012_3873_MOESM3_ESM.pdf]

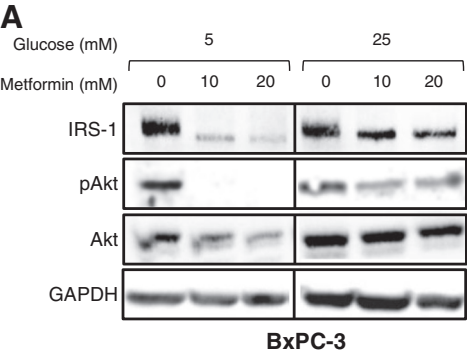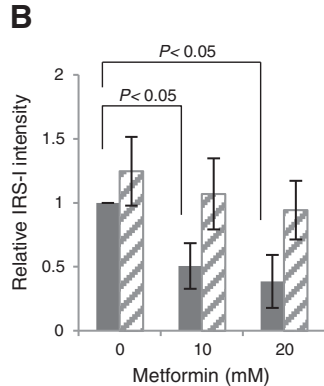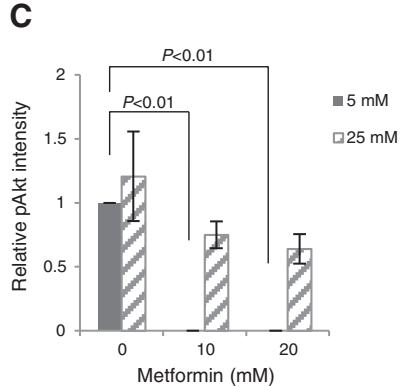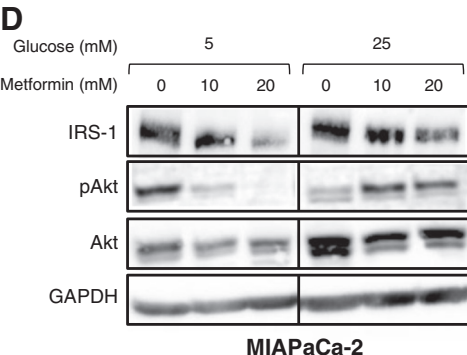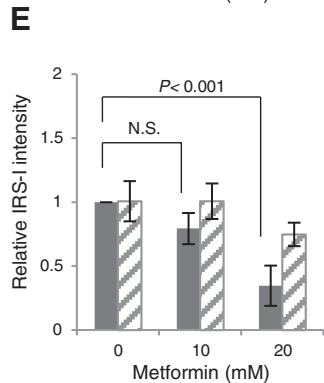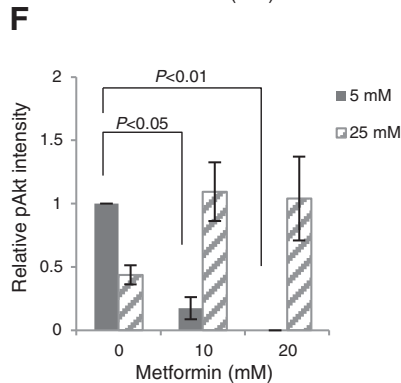

Supplement: 12885_2012_3873_MOESM4_ESM.pdf [file 12885_2012_3873_MOESM4_ESM.pdf]

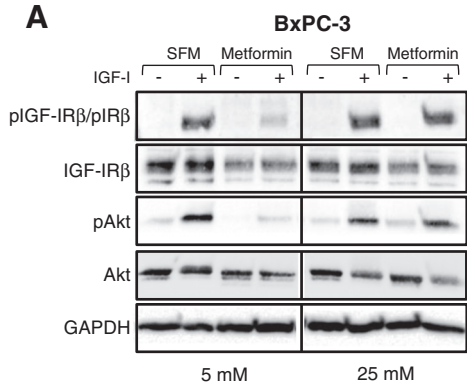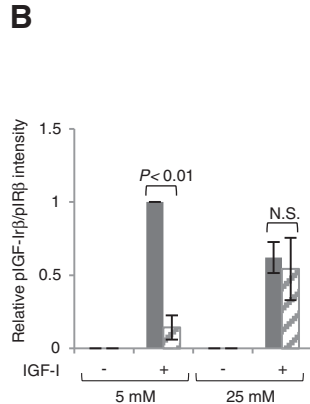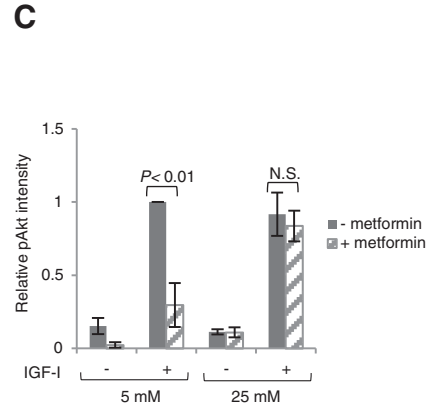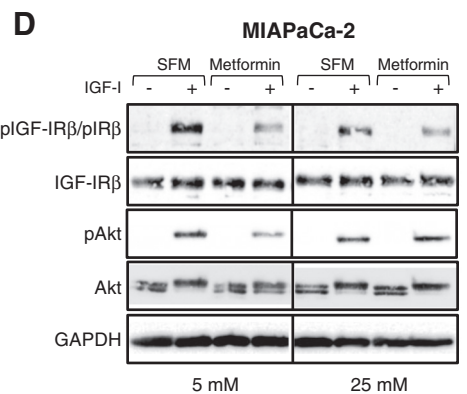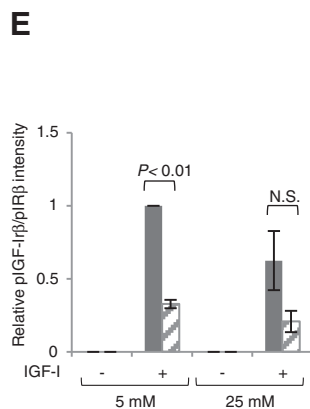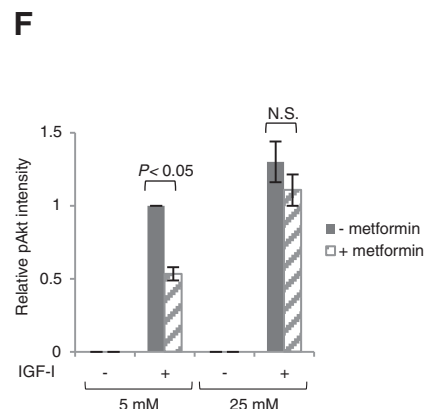

Supplement: 12885_2012_3873_MOESM6_ESM.pdf [file 12885_2012_3873_MOESM6_ESM.pdf]
